# Supplementary material for: Morbidity of Returning Travelers Seen in Community Urgent Care Centers throughout Israel
Source: MDPI journal article supplement (doi:10.3390/tropicalmed8060319), 2023-06-13
Supplement: s1 [file s1]

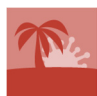

Communication

# Morbidity of Returning Travelers Seen in Community Urgent Care Centers throughout Israel <sup>†</sup>

Eyal Itzkowitz <sup>1,†</sup>, Evan A. Alpert <sup>2,3,†</sup>, Abdulhadi Z. Farojeh <sup>4</sup>, Deena R. Zimmerman <sup>4,5</sup>, Eli Schwartz <sup>6,7,\*</sup>  
and Tamar Lachish <sup>3,8</sup>

## Supplement S1. Detecting travelers - Electronic questionnaire for TEREM clinics

Clerk

- Have you been abroad in the last month? YES/ NO

Nurse/ Physician

- Demographics - Age (drop down list), Sex (drop down list), Country of birth (drop down list)
- Medical history (dialog box)
- Departure date (drop down list), return date (drop down list)
- Continents visited (drop down list), countries visited (drop down list)
- Nature of travel (drop down list)
- Vaccination history before travel YES/ NO
- Medical consultation before travel YES/ NO
- Does the patient think that his/ her illness is travel related? YES/ NO/ UNSURE
- Physician opinion on the same question YES/ NO/ UNSURE
- Diagnosis (drop down list)
- Diagnosis category (medical/ trauma)
- Outcome (discharge, referral to ER, ambulance evacuation, death)
- Infectious diseases consultation YES/ NO
